# Supplementary material for: The genomic diversity and antimicrobial resistance of Non-typhoidal Salmonella in humans and food animals in Northern India
Source: PubMed Central journal article supplement (PMC11439553; doi:10.1016/j.onehlt.2024.100892), 2024-09-12
Supplement: mmc1.pdf [file mmc1.pdf]

Table S1. Clinical details of patients samples included in this study

| S. no | Year of isolation | Serovar     | Location                | Age group      | Diagnosis                                        | Fever | Pain abdomen | Vomiting | Dehydration | Hospitalization | Duration of diarrhoea at time of presentation | Vesikari score | Severity |
|-------|-------------------|-------------|-------------------------|----------------|--------------------------------------------------|-------|--------------|----------|-------------|-----------------|-----------------------------------------------|----------------|----------|
| 1     | 2017              | Kentucky    | Manimajra, Chandigarh   | <5 years child | Acute gastroenteritis                            | +     | +            | -        | +           | -               | 7                                             | 9              | Moderate |
| 2     | 2016              | Kentucky    | Chandigarh              | <5 years child | Acute gastroenteritis                            | +     | +            | +        | +           | +               | 2                                             | 14             | Severe   |
| 3     | 2014              | Typhi       | Chandigarh              | >5 years child | Pyrexia of unknown origin with diarrhoea         | +     | +            | +        | +           | +               | 5                                             | 15             | Severe   |
| 4     | 2015              | Typhimurium | Kishangarh, Haryana     | <5 years child | Acute gastroenteritis                            | +     | +            | -        | +           | -               | 3                                             | 7              | Moderate |
| 5     | 2015              | ND          | Panchkula, Haryana      | >5 years child | Acute foodborne gastroenteritis                  | +     | -            | +        | -           | -               | 2                                             | 8              | Moderate |
| 6     | 2014              | Agona       | Chandigarh              | Adult          | Acute foodborne gastroenteritis                  | +     | +            | +        | +           | +               | 7                                             | 13             | Severe   |
| 7     | 2017              | Newport     | Nawashaher, Punjab      | Adult          | Acute foodborne gastroenteritis with neutropenia | +     | +            | +        | +           | +               | 1                                             | 15             | Severe   |
| 8     | 2015              | Typhimurium | Manimajra, Chandigarh   | <5 years child | Undifferentiated fever with diarrhoea            | +     | +            | +        | +           | +               | 5                                             | 14             | Severe   |
| 9     | 2015              | Paratyphi A | Moli Jagran, Chandigarh | <5 years child | Acute gastroenteritis                            | +     | -            | -        | +           | -               | 10                                            | 8              | Moderate |

|    |      |             |                        |                |                                                    |   |   |   |   |   |   |    |          |
|----|------|-------------|------------------------|----------------|----------------------------------------------------|---|---|---|---|---|---|----|----------|
| 10 | 2014 | Infantis    | Ambala, Haryana        | Adult          | Acute foodborne gastroenteritis                    | + | + | + | + | + | 2 | 10 | Moderate |
| 11 | 2015 | Typhi       | Chandigarh             | Adult          | Fever with Acute gastroenteritis                   | + | + | + | - | - | 1 | 8  | Moderate |
| 12 | 2015 | Kentucky    | Nawan Shahar, Punjab   | Adult          | Acute gastroenteritis with splenomegaly            | + | + | + | - | - | 2 | 8  | Moderate |
| 13 | 2015 | Typhi       | Manimajra, Chandigarh  | Adult          | Fever with acute gastroenteritis                   | + | + | + | - | + | 3 | 12 | Severe   |
| 14 | 2016 | Saintpaul   | Manimajra, Chandigarh  | Adult          | Acute foodborne gastroenteritis                    | - | + | + | + | - | 2 | 8  | Moderate |
| 15 | 2016 | Enteritidis | Rishikesh, Uttarakhand | <5 years child | Acute gastroenteritis                              | - | - | + | + | - | 3 | 9  | Moderate |
| 16 | 2017 | Paratyphi A | Chandigarh             | Adult          | Dysentery                                          | + | + | - | - | - | 7 | 11 | Severe   |
| 17 | 2014 | Kentucky    | Amritsar, Punjab       | Adult          | Acute myeloid leukaemia with acute gastroenteritis | - | + | + | + | + | 2 | 18 | Severe   |
| 18 | 2015 | Bareilly    | Panchkula, Haryana     | >5 years child | Acute foodborne gastroenteritis                    | - | + | + | - | - | 4 | 8  | moderate |
| 19 | 2017 | Kentucky    | Chandigarh             | Adult          | Foodborne gastroenteritis                          | + | + | + | - | - | 3 | 9  | Moderate |
| 20 | 2014 | Virchow     | Karnal, Haryana        | Adult          | Post transplant dysentery                          | + | + | + | - | + | 2 | 14 | Severe   |
| 21 | 2015 | Kentucky    | Mohali, Punjab         | Adult          | Acute gastroenteritis with chronic kidney disease  | + | + | + | + | + | 3 | 14 | severe   |

|    |      |                         |                          |                |                                 |   |   |   |   |   |   |    |          |
|----|------|-------------------------|--------------------------|----------------|---------------------------------|---|---|---|---|---|---|----|----------|
| 22 | 2014 | Typhimurium             | Manimajra, Chandigarh    | <5 years child | Acute gastroenteritis           | - | + | + | + | + | 5 | 11 | Severe   |
| 23 | 2015 | ND Anatum by serotyping | Noorpur, Haryana         | Adult          | Dysentery                       | + | + | + | + | + | 7 | 14 | Severe   |
| 24 | 2015 | Saintpaul               | Manimajra, Chandigarh    | <5 years child | Dysentery                       | + | + | + | + | - | 1 | 10 | Moderate |
| 25 | 2015 | Kentucky                | Chandigarh               | Adult          | Acute foodborne gastroenteritis | + | + | + | + | + | 2 | 13 | Severe   |
| 26 | 2016 | Saintpaul               | Kalka, Haryana           | Adult          | Acute foodborne gastroenteritis | + | + | - | + | - | 4 | 9  | Moderate |
| 27 | 2015 | Typhi                   | Chandigarh               | Adult          | Fever with diarrhoea            | + | + | - | + | + | 4 | 12 | Severe   |
| 28 | 2014 | ND                      | Chandigarh               | Adult          | Foodborne gastroenteritis       | + | + | + | - | - | 3 | 10 | Moderate |
| 29 | 2016 | Virchow                 | Shimla, Himachal Pradesh | Adult          | Acute foodborne gastroenteritis | + | + | + | - | - | 2 | 9  | Moderate |
| 30 | 2014 | Kentucky                | Nayagaon, Punjab         | Adult          | Acute foodborne gastroenteritis | + | + | + | - | - | 3 | 10 | Moderate |
| 31 | 2015 | Entertidis              | Zirakpur, Punjab         | Adult          | Foodborne acute gastroenteritis | + | + | + | + | + | 2 | 14 | Severe   |

ND= Not determined by WGS

Supplementary Table S2: Plasmid replicon types and incompatibility groups in NTS

| Incompatibility group | Type            | n |
|-----------------------|-----------------|---|
| IncF                  | IncFIB(S).1     | 6 |
|                       | IncFIB(pHCM2).1 | 2 |
|                       | IncFII(S).1     | 6 |
|                       | IncFII(Yp).1    | 1 |
|                       | IncFII(p96A).1  | 1 |
| IncX                  | IncX2.1         | 3 |
|                       | IncX1.1         | 1 |
|                       | IncX1.3         | 1 |
|                       | IncX1.4         | 1 |
| IncP                  | IncP_alpha      | 1 |
| Incl                  | Incl1.1_Alpha   | 9 |
| Colicins              | ColpVC.1        | 6 |
|                       | Col156.1        | 1 |
|                       | ColRNAI.1       | 4 |
| Others                | pN-Cit          | 1 |
|                       | l2_delta        | 1 |
|                       | pDKX1-TEM-52    | 1 |
| Total                 | 17              |   |

Supplementary Table S3: Sequence parameters used during SNP tree generation

| Isolate | Cover%_NZ_CP026327 | Depth_NZ_CP026327 | Mapped%_NZ_CP026327 | Mapped%_Total | Total_Reads | SNPs   | Hets_Removed | Indels | Ingroup/Fail |
|---------|--------------------|-------------------|---------------------|---------------|-------------|--------|--------------|--------|--------------|
| 782-14  | 14.51714           | 8.829324          | 7.172666734         | 7.172666734   | 751436      | 318    | 13           | 0      | f            |
| P11     | 90.75372           | 41.14509          | 91.64515637         | 91.64515637   | 1427998     | 42677  | 253          | 365    | i            |
| P15     | 91.84979           | 8.494584          | 95.56866211         | 95.56866211   | 488814      | 36117  | 323          | 247    | f            |
| C164    | 91.10935           | 18.75978          | 88.78949654         | 88.78949654   | 1027242     | 34005  | 287          | 261    | i            |
| C73     | 98.40633           | 16.32032          | 98.14985345         | 98.14985345   | 510392      | 172    | 2            | 8      | i            |
| P28     | 87.23214           | 16.14439          | 92.27597179         | 92.27597179   | 751758      | 35277  | 422          | 238    | i            |
| 57-14   | 90.29811           | 7.608945          | 93.2037507          | 93.2037507    | 394806      | 38687  | 379          | 226    | f            |
| S-207   | 98.52406           | 13.68337          | 97.92869757         | 97.92869757   | 738376      | 187    | 2            | 9      | i            |
| M706    | 98.42721           | 16.05987          | 98.96610961         | 98.96610961   | 505276      | 176    | 2            | 6      | i            |
| 2447-15 | 89.25027           | 17.28663          | 91.65236814         | 91.65236814   | 911516      | 46407  | 512          | 365    | i            |
| PM118A  | 91.10904           | 14.56767          | 93.17105767         | 93.17105767   | 805132      | 33189  | 486          | 202    | i            |
| 840-14  | 83.31558           | 14.2888           | 81.04041153         | 81.04041153   | 790418      | 117553 | 2034         | 447    | o            |
| GM121   | 92.24623           | 33.63864          | 96.43088871         | 96.43088871   | 1189820     | 41921  | 145          | 350    | i            |
| M747    | 91.61668           | 22.53296          | 91.1025156          | 91.1025156    | 707346      | 38847  | 128          | 269    | i            |
| PM33    | 91.78863           | 25.10817          | 91.45107013         | 91.45107013   | 744678      | 35364  | 402          | 279    | i            |
| PM32    | 91.01984           | 14.95053          | 90.58162961         | 90.58162961   | 804120      | 41670  | 635          | 317    | i            |
| P7      | 90.12433           | 12.97797          | 91.41317644         | 91.41317644   | 712848      | 45935  | 313          | 331    | i            |
| PM116   | 90.97974           | 12.93912          | 93.51692647         | 93.51692647   | 706054      | 46939  | 348          | 339    | i            |
| PM75    | 90.18918           | 7.643145          | 91.650593           | 91.650593     | 397130      | 38618  | 377          | 254    | f            |
| P34     | 91.75071           | 66.96281          | 91.94748788         | 91.94748788   | 2343840     | 43455  | 749          | 381    | i            |
| P13     | 91.78059           | 14.54977          | 89.59183284         | 89.59183284   | 838284      | 41961  | 574          | 333    | i            |

|         |          |          |             |             |         |       |       |     |   |
|---------|----------|----------|-------------|-------------|---------|-------|-------|-----|---|
| HS23    | 90.57873 | 15.26338 | 90.91226637 | 90.91226637 | 827368  | 45067 | 1035  | 321 | i |
| PM117   | 90.95617 | 13.48771 | 93.51988987 | 93.51988987 | 842640  | 46525 | 293   | 331 | i |
| C157    | 98.38288 | 7.649235 | 99.03402771 | 99.03402771 | 395560  | 110   | 0     | 8   | f |
| C143    | 98.49522 | 14.42387 | 99.11893818 | 99.11893818 | 774066  | 202   | 7     | 9   | i |
| C144    | 98.48696 | 18.609   | 99.09542729 | 99.09542729 | 985106  | 208   | 2     | 8   | i |
| 389-17  | 14.30523 | 1.424881 | 50.80701754 | 50.80701754 | 632700  | 0     | 0     | 0   | f |
| PM30    | 91.63405 | 12.68874 | 88.13831591 | 88.13831591 | 707800  | 41080 | 1035  | 304 | i |
| G18     | 96.82152 | 20.18266 | 97.71345293 | 97.71345293 | 620980  | 183   | 10    | 6   | i |
| P3      | 88.93545 | 13.71014 | 93.23962063 | 93.23962063 | 708762  | 46450 | 781   | 351 | i |
| PM34    | 90.06548 | 17.57735 | 89.82096027 | 89.82096027 | 952526  | 46176 | 605   | 334 | i |
| PM130   | 90.99274 | 12.76989 | 91.23493564 | 91.23493564 | 423682  | 32831 | 3111  | 255 | i |
| 522-17  | 90.18249 | 30.13179 | 95.16008643 | 95.16008643 | 841358  | 39349 | 120   | 297 | i |
| C181    | 92.60386 | 102.2975 | 86.0737     | 86.0737     | 4021384 | 31503 | 36665 | 288 | i |
| P16     | 90.78429 | 8.28792  | 89.4549058  | 89.4549058  | 447042  | 35625 | 388   | 245 | f |
| G24     | 91.20365 | 34.19333 | 92.95501631 | 92.95501631 | 975020  | 37228 | 150   | 304 | i |
| C134    | 98.46604 | 11.2012  | 99.14243662 | 99.14243662 | 693010  | 177   | 2     | 9   | i |
| M278    | 91.39272 | 10.44613 | 90.57414739 | 90.57414739 | 563270  | 44860 | 341   | 304 | i |
| G25A    | 89.88124 | 17.52268 | 91.43139886 | 91.43139886 | 473928  | 39441 | 432   | 265 | i |
| P47     | 90.78612 | 8.846728 | 90.88955476 | 90.88955476 | 477902  | 36950 | 866   | 240 | f |
| C147    | 98.52234 | 42.25007 | 99.10764659 | 99.10764659 | 1460520 | 248   | 19    | 7   | i |
| M277    | 90.55487 | 17.53273 | 88.1197626  | 88.1197626  | 518626  | 39437 | 351   | 243 | i |
| 830-15  | 87.23148 | 18.6976  | 87.46485838 | 87.46485838 | 1027272 | 55237 | 356   | 541 | i |
| PM150   | 89.88467 | 18.09222 | 94.00210779 | 94.00210779 | 601578  | 33772 | 312   | 224 | i |
| C139    | 98.16757 | 14.75621 | 98.95736741 | 98.95736741 | 446466  | 172   | 2     | 4   | i |
| 688-15  | 87.45549 | 46.82195 | 88.82191589 | 88.82191589 | 1626692 | 56436 | 213   | 592 | i |
| M270    | 90.37082 | 8.377021 | 86.5117308  | 86.5117308  | 465612  | 40845 | 401   | 283 | f |
| PM115   | 90.86744 | 8.609837 | 93.40051093 | 93.40051093 | 443898  | 41821 | 466   | 272 | f |
| 1496-14 | 91.3106  | 13.05655 | 90.90218773 | 90.90218773 | 750642  | 44559 | 743   | 343 | i |
| P25     | 90.37297 | 16.2638  | 90.61060223 | 90.61060223 | 876872  | 46123 | 858   | 328 | i |

|           |          |          |             |             |         |       |      |     |   |
|-----------|----------|----------|-------------|-------------|---------|-------|------|-----|---|
| M363      | 89.44564 | 17.66491 | 94.93128223 | 94.93128223 | 479352  | 38645 | 282  | 249 | i |
| PM118B    | 90.9868  | 14.93497 | 93.65769771 | 93.65769771 | 835028  | 47637 | 306  | 356 | i |
| C89       | 90.93742 | 13.57419 | 89.03733317 | 89.03733317 | 743414  | 46949 | 690  | 365 | i |
| C138      | 90.00205 | 12.509   | 89.11168259 | 89.11168259 | 680500  | 42125 | 340  | 319 | i |
| C78       | 98.50134 | 14.36255 | 98.28447312 | 98.28447312 | 768860  | 203   | 2    | 9   | i |
| PM119     | 91.63001 | 14.89502 | 90.27390029 | 90.27390029 | 814530  | 41334 | 1034 | 316 | i |
| C161      | 98.48061 | 11.58905 | 98.85743685 | 98.85743685 | 618084  | 123   | 4    | 5   | i |
| P42       | 91.18914 | 79.94231 | 91.79279917 | 91.79279917 | 3044814 | 43354 | 219  | 373 | i |
| C186      | 90.8664  | 10.40614 | 88.78429616 | 88.78429616 | 593944  | 45371 | 364  | 334 | i |
| P8        | 89.8327  | 14.88891 | 92.10735881 | 92.10735881 | 796134  | 46140 | 294  | 311 | i |
| C137      | 98.50679 | 17.0632  | 99.08028823 | 99.08028823 | 913982  | 213   | 3    | 9   | i |
| P17merge  | 89.8691  | 18.23817 | 89.63316118 | 89.63316118 | 956878  | 49922 | 565  | 384 | i |
| PM122     | 90.88246 | 15.23541 | 95.51710013 | 95.51710013 | 424792  | 37673 | 377  | 248 | i |
| C133      | 98.22675 | 17.09589 | 99.16766487 | 99.16766487 | 422426  | 227   | 1    | 9   | i |
| M361      | 87.78383 | 20.95786 | 95.45815029 | 95.45815029 | 547244  | 43851 | 255  | 338 | i |
| S-783     | 91.59499 | 18.20322 | 90.48691081 | 90.48691081 | 986998  | 42105 | 752  | 329 | i |
| C162      | 98.49767 | 16.22575 | 98.85704845 | 98.85704845 | 865566  | 195   | 2    | 7   | i |
| 76814     | 98.43861 | 16.99955 | 98.06781854 | 98.06781854 | 476094  | 166   | 2    | 7   | i |
| PM143     | 90.09335 | 24.19117 | 93.63839878 | 93.63839878 | 753128  | 37671 | 195  | 266 | i |
| C136      | 90.09574 | 8.457764 | 89.02347476 | 89.02347476 | 452912  | 36560 | 524  | 258 | f |
| H243      | 98.21881 | 16.30011 | 97.45163065 | 97.45163065 | 879896  | 149   | 0    | 6   | i |
| PM129     | 90.89285 | 16.54687 | 91.58537048 | 91.58537048 | 1000662 | 41867 | 244  | 334 | i |
| PM146     | 90.10562 | 54.49616 | 92.28817093 | 92.28817093 | 1961558 | 47483 | 169  | 362 | i |
| GM124     | 90.75006 | 86.82271 | 87.50924816 | 87.50924816 | 3581794 | 44516 | 118  | 386 | i |
| P46merge  | 90.85073 | 19.46875 | 93.17910469 | 93.17910469 | 990002  | 42349 | 415  | 347 | i |
| P32       | 91.68463 | 55.25626 | 92.14321378 | 92.14321378 | 1998858 | 43336 | 733  | 368 | i |
| PM92      | 90.59401 | 12.58866 | 86.51338597 | 86.51338597 | 715376  | 42103 | 932  | 315 | i |
| UR34merge | 89.77264 | 14.96303 | 92.29408906 | 92.29408906 | 753214  | 46164 | 535  | 361 | i |
| C75       | 98.51265 | 17.52539 | 98.52967239 | 98.52967239 | 1263936 | 185   | 0    | 9   | i |

|           |          |          |             |             |         |       |      |     |   |
|-----------|----------|----------|-------------|-------------|---------|-------|------|-----|---|
| C148      | 98.52214 | 20.19263 | 98.58803895 | 98.58803895 | 1089336 | 177   | 2    | 6   | i |
| PM132     | 90.86797 | 11.75192 | 91.47790853 | 91.47790853 | 664872  | 40781 | 343  | 302 | i |
| C141      | 98.34609 | 18.33928 | 99.09642527 | 99.09642527 | 576156  | 205   | 2    | 8   | i |
| 1511-15   | 87.44298 | 14.98705 | 86.83525292 | 86.83525292 | 814934  | 53885 | 1168 | 518 | i |
| P38       | 90.7045  | 15.68415 | 91.96214931 | 91.96214931 | 829998  | 46669 | 523  | 344 | i |
| C155      | 98.50498 | 19.19555 | 98.69672328 | 98.69672328 | 992882  | 191   | 3    | 8   | i |
| PM120     | 91.3781  | 9.350859 | 89.41809228 | 89.41809228 | 570984  | 38090 | 465  | 287 | f |
| 1217-15   | 89.62793 | 7.041332 | 92.26431391 | 92.26431391 | 361222  | 35309 | 375  | 226 | f |
| C145merge | 98.51022 | 13.5     | 98.10469132 | 98.10469132 | 694346  | 188   | 35   | 6   | i |
| G26       | 98.51324 | 12.77868 | 97.36337098 | 97.36337098 | 687848  | 192   | 2    | 7   | i |
| P4merge   | 91.91868 | 21.09288 | 92.84824335 | 92.84824335 | 1093158 | 42854 | 337  | 345 | i |
| Jun-17    | 87.45163 | 17.78711 | 92.51599166 | 92.51599166 | 912038  | 52625 | 448  | 446 | i |
| G25merge  | 90.26091 | 17.66755 | 89.01617971 | 89.01617971 | 954158  | 47206 | 647  | 346 | i |
| PM144     | 89.94387 | 20.68151 | 93.12967405 | 93.12967405 | 1102364 | 46687 | 335  | 339 | i |
| G52B      | 89.61783 | 9.78053  | 85.7762451  | 85.7762451  | 546902  | 42642 | 452  | 282 | f |
| 1718-15   | 87.29544 | 14.96748 | 90.28944181 | 90.28944181 | 396280  | 44912 | 665  | 393 | i |
| PM149     | 89.89871 | 14.97479 | 94.12696842 | 94.12696842 | 768002  | 45748 | 598  | 318 | i |
| 1414-16   | 98.51671 | 19.35424 | 97.15612504 | 97.15612504 | 1044842 | 231   | 6    | 7   | i |
| M494      | 91.61752 | 15.54957 | 87.88932006 | 87.88932006 | 770510  | 35614 | 495  | 226 | i |
| C180      | 91.05135 | 25.69842 | 89.44344686 | 89.44344686 | 1387792 | 48660 | 242  | 408 | i |
| P5        | 91.10406 | 15.51749 | 90.77501327 | 90.77501327 | 727394  | 31561 | 492  | 233 | i |
| PM13      | 90.3907  | 20.02551 | 88.68138752 | 88.68138752 | 613008  | 43372 | 945  | 288 | i |
| 102-14    | 87.059   | 14.52202 | 88.63868484 | 88.63868484 | 468018  | 42133 | 563  | 335 | i |
| G27merge  | 91.05251 | 14.40283 | 91.45567696 | 91.45567696 | 756514  | 41891 | 550  | 321 | i |
| PM151     | 89.82915 | 16.27619 | 92.13869383 | 92.13869383 | 938470  | 45990 | 322  | 330 | i |
| PM31      | 91.71735 | 15.90018 | 87.96073419 | 87.96073419 | 898186  | 42133 | 866  | 321 | i |
| 1427-15   | 98.50649 | 11.78445 | 99.17162773 | 99.17162773 | 625202  | 170   | 3    | 6   | i |
| P56       | 89.84153 | 16.83799 | 92.31981215 | 92.31981215 | 1085950 | 45645 | 225  | 329 | i |
| W13       | 90.80247 | 12.80838 | 93.20804357 | 93.20804357 | 673532  | 44296 | 900  | 334 | i |

|         |          |          |             |             |        |       |     |     |   |
|---------|----------|----------|-------------|-------------|--------|-------|-----|-----|---|
| C140    | 98.45233 | 12.20984 | 98.93065749 | 98.93065749 | 643386 | 191   | 2   | 7   | i |
| P50     | 91.08608 | 32.87122 | 93.48423638 | 93.48423638 | 949528 | 35081 | 176 | 284 | i |
| 1185-16 | 98.47602 | 10.82653 | 97.81319585 | 97.81319585 | 583820 | 191   | 5   | 6   | i |
| PM114   | 89.83633 | 14.1222  | 90.45372914 | 90.45372914 | 757280 | 45747 | 536 | 311 | i |
| C91     | 90.8711  | 13.12157 | 88.92379736 | 88.92379736 | 804644 | 46947 | 306 | 381 | i |
| CM11    | 91.29889 | 17.42717 | 90.46549017 | 90.46549017 | 528690 | 37832 | 332 | 264 | i |
